# AptaMat: a matrix-based algorithm to compare single-stranded oligonucleotides secondary structures

Thomas Binet<sup>1</sup>, Bérangère Avelle<sup>1</sup>, Miraine Dávila Felipe<sup>2,\*</sup> and Irene Maffucci<sup>1,\*</sup>

<sup>1</sup>Université de technologie de Compiègne, UPJV, CNRS, Enzyme and Cell Engineering, Centre de recherche Royallieu - CS 60 319 - 60 203 Compiègne Cedex

<sup>2</sup>Université de technologie de Compiègne, LMAC (Laboratory of Applied Mathematics of Compiègne), CS 60 319 - 60 203 Compiègne Cedex

\*To whom correspondence should be addressed.

## Abstract

1 Comparing single-stranded nucleic acids (ssNAs) secondary structures is fundamental when inves-  
2 tigating their function and evolution and predicting the effect of mutations on the ssNAs structures.  
3 Many comparison metrics exist, although they are either too elaborate or not enough sensitive to  
4 distinguish close ssNAs structures.  
5 In this context, we developed AptaMat, a simple and sensitive algorithm for ssNAs secondary struc-  
6 tures comparison based on matrices representing the ssNAs secondary structures and a metric built  
7 upon the Manhattan distance in the plane. We applied AptaMat to several examples and compared  
8 the results to those obtained by the most frequently used metrics, namely the Hamming distance and  
9 the RNAdistance, and by a recently developed image-based approach. We showed that AptaMat is  
10 able to discriminate between similar sequences, outperforming all the other here considered metrics.

## Introduction

11 Single-stranded nucleic acids (ssNAs) are interesting molecules from both a biological and a biotech-  
12 nological point of view. On one side, RNA is fundamental for protein synthesis and it has cellu-  
13 lar structural, functional and regulatory roles. On the other side, both RNA and single -stranded  
14 DNA, in the form of aptamers, can be exploited as therapeutic or diagnostic tools or as biosensors  
15 [Kulabhusan *et al.*, 2020]. Aptamers are, indeed, short single-stranded oligonucleotides able to bind  
16 a large variety of molecular targets with high specificity and dissociation constants in the nano- to  
17 picomolar range by adopting specific conformations [Li *et al.*, 2020, Nimjee *et al.*, 2017].

18 SsNAs function highly depends on their secondary (i.e. their base pairing pattern) and tertiary  
19 (i.e. their 3D organization) structures [Li *et al.*, 2020, Mustoe *et al.*, 2014, Nimjee *et al.*, 2017], thus  
20 the computational prediction of these two levels of organization can help to understand ssNAs  
21 roles and interactions with other molecules. The prediction of the ssNAs secondary structures of-  
22 ten precedes and guides the 3D modeling step and many tools have been developed at this scope  
23 ([Zuker., 2003, Gruber *et al.*, 2008b, Sato *et al.*, 2009]). The resulting output is usually a graphical  
24 representation of the predicted secondary structure (Figure 1c) and/or its dot-bracket notation (Fig-  
25 ure 1b), which consists in a string of the same length as the sequence based on an alphabet of 3  
26 characters: {".", "(", ")"}. The symbol "." indicates that the nucleotide in the corresponding position is  
27 unpaired, while "(" and ")" correspond to the opening and closing positions of a base pair, respec-  
28 tively.

29 The comparison of ssNAs secondary structures is a task as important as the prediction of the sec-  
30 ondary structure itself. Comparing ssNAs structures can help to study the function and evolution of  
31 ssNAs, but also to design nucleotide sequences that fold into a given secondary structure and to pre-  
32 dict mutations that can cause a conformational rearrangement. Therefore, different algorithms have  
33 been developed at this scope (see [Gruber *et al.*, 2008a] for a review). Briefly, these can be classified in  
34 algorithms i) based on the minimum free energy [Washietl *et al.*, 2005], ii) based on single structure

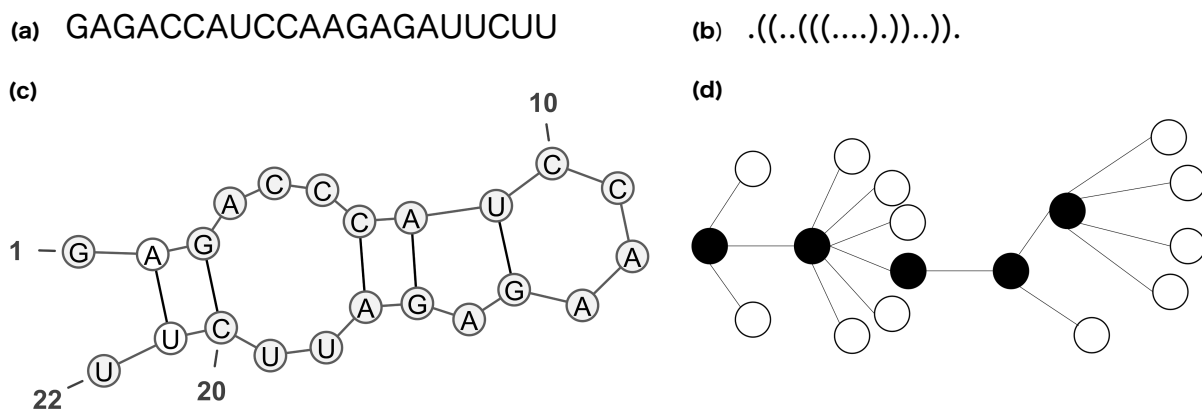

Figure 1: Example of representations of the secondary structure of sequence (a): dot-bracket notation (b), graphical representation realized with VARNA([Darty *et al.*, 2009]) (c), and full tree representation (d).

35 [Shapiro *et al.*, 1988, Moulton *et al.*, 2000, Fontana *et al.*, 1993, Flamm *et al.*, 2001] and iii) consider-  
 36 ing the whole folding space [Hofacker *et al.*, 1994, Bonhoeffer *et al.*, 1993, Giegerich *et al.*, 2004]. Among  
 37 them, the most frequently applied are those working on single structures, such as the Hamming distance  
 38 [Hamming., 1950] and the RNAdistance algorithm implemented in the ViennaRNA package  
 39 [Hofacker *et al.*, 2003]. The Hamming distance allows to compare two strings of the same length by  
 40 counting the number of positions with different symbols. It is one of the simplest metrics used in the  
 41 context of ssNAs, and it is usually calculated by counting the number of positions with different nu-  
 42 cleotides (Equation 2). It can be adapted to strings in the dot-bracket notation, which is more suitable  
 43 for secondary structures comparison. Conversely, RNAdistance is based on the comparison of ssNAs  
 44 secondary structures represented as ordered rooted trees (Figure1d), deduced from the dot-bracket  
 45 notation [Shapiro *et al.*, 1988].

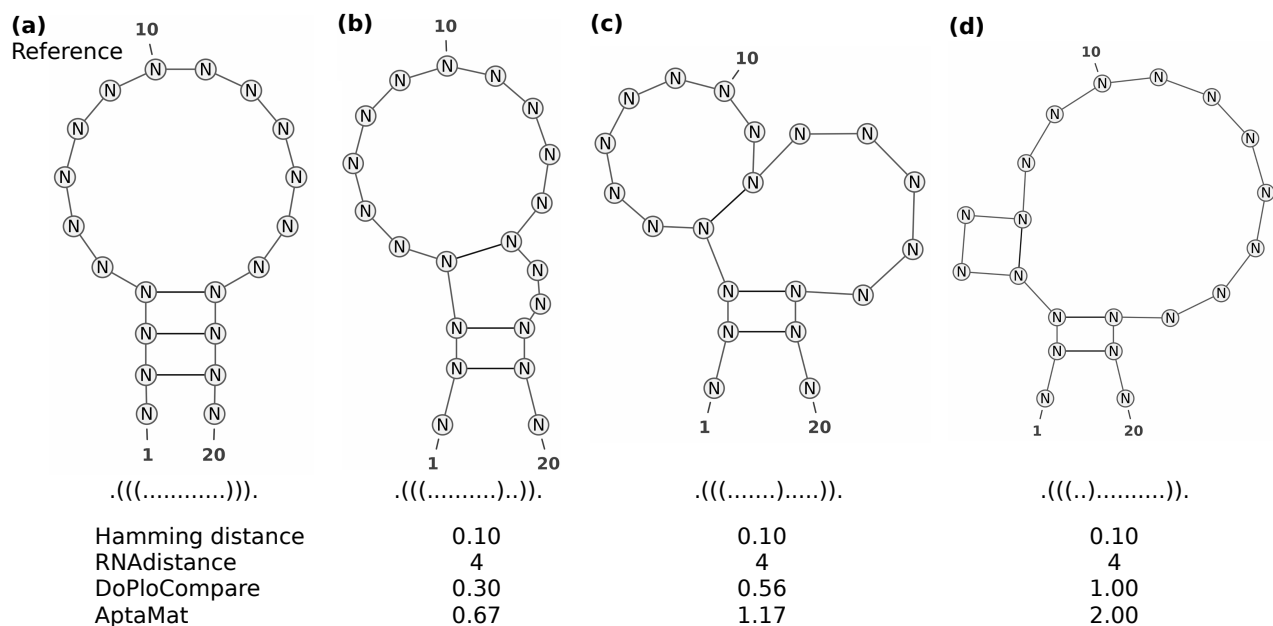

Figure 2: Reference (a) and alternative (b, c, and d) structures for ssNA 1. The Hamming, RNAdistance, DoPloCompare, and AptaMat distances are computed using structure (a) as reference.

46 However, these two metrics sometimes fail in finding differences between secondary structures as  
 47 showed in the example of Figure 2 adapted from [Ivry *et al.*, 2009], where both the Hamming distance  
 48 and RNAdistance cannot capture the differences between structures (b), (c) or (d) and the reference  
 49 structure (a). Indeed, the Hamming distance only considers the total number of matching positions,  
 50 without taking into account the correlations between the opening and closing positions, which are  
 51 characteristic for the structure. On the other hand, RNAdistance works with a tree representation  
 52 that, even at full resolution (i.e. without any loss of information with regard to the dot-bracket  
 53 notation), might lead to an equivalent cost in the tree editing operations for structures that seem  
 54 to have a different degree of proximity to the reference one. This is illustrated in Figure 2, and the  
 55 details about the computation of RNAdistance can be found in Figure S1 of Supplementary Material.

56 Interesting approaches for comparing ssNAs secondary structures based on image processing,  
 57 such as DoPloCompare [Ivry *et al.*, 2009], have been developed. These approaches consist in repre-

58 sending the secondary structures of the two compared ssNAs as dotplots and then processing them  
59 as images in order to measure the distance between the two structures. The use of dotplots allows  
60 to take into account the base pairs relative positions and it provides a finer description of the ssNA  
61 structure than RNAdistance [Ivry *et al.*, 2009]. However, this approach can be laborious and some-  
62 times it fails in finding the expected trend when comparing multiple structures to a reference one,  
63 as we will show later. Indeed, although the image processing approach is a novelty in the field, the  
64 proposed metrics use a combination of geometrical distance and histogram correlations that might  
65 hinder the nature of the proximity between the compared structures. Moreover, DoPloCompare  
66 seems to be not symmetric, which is an important requirement for many applications.

67 Although there exist several other approaches to compare secondary structures, to our knowl-  
68 edge, none of them satisfy the desired properties: i) simple in terms of results interpretation; ii) easy  
69 to implement and to manipulate; iii) exploitable for the comparison of pairs of structures, but also of  
70 multiple structures to a reference one, and, most of all, iv) sensitive, in order to properly differentiate  
71 particularly close structures. Therefore, we developed a new algorithm, called AptaMat, which solves  
72 the issues of both the single structure-based and the image-based approaches. Briefly, AptaMat takes  
73 as input the secondary structure of two ssNAs ( $S_A$  and  $S_B$ ) of same length  $L$  in the dot-bracket nota-  
74 tion and creates for each of them a matrix of size  $L \times L$ , comparable to a dotplot with 1 and 0 instead  
75 of dots and blank cells, respectively. Indeed, the  $(i, j)^{\text{th}}$  entry of the matrix is either equal to 1 if the  
76 nucleotide in position  $i$  is paired with the nucleotide in position  $j$  or 0 if the nucleotides in positions  
77  $i$  and  $j$  are not paired. For each base pair of each structure, we find the closest base pair on the  
78 other structure using the Manhattan distance between points in the plane. The distances between all  
79 the closest pairs are summed up and normalized by the total number of cells containing 1 in both  
80 matrices, in order to find the final AptaMat distance (Figures S2 and S3, Supplementary Material).

81 We applied our approach to i) 5 examples taken from the work by [Ivry *et al.*, 2009] in order to  
82 make a direct comparison with the Hamming distance, RNAdistance and DoPloCompare and ii) to 5  
83 structures of aptamers taken from the Protein Data Bank [Berman *et al.*, 2000]. In addition, we *ad hoc*  
84 created an example capable of showing the advantages of our method as compared to both RNAdis-  
85 tance and the Hamming distance at the same time. The obtained results show that AptaMat is able  
86 to properly compare ssNAs secondary structures and to well discriminate among different struc-  
87 tures. The python code implementing AptaMat is available on GitHub at [https://github.com/GEC-](https://github.com/GEC-git/AptaMat.git)  
88 [git/AptaMat.git](https://github.com/GEC-git/AptaMat.git).

## Methods

### AptaMat algorithm

89 The AptaMat algorithm has been developed for the comparison and quantification of the differences  
90 between structures of pairs of ssNAs of the same length ( $L$ ), with the main aim of investigating the  
91 effect of mutations on the ssNAs structure. The algorithm takes as input the two structures written  
92 in the dot-bracket notation, with one structure considered as reference. Starting from each input  
93 dot-bracket string a square matrix of  $L \times L$  in size is created, where each matrix cell  $(i, j)$  corresponds  
94 to the position  $i$  of a nucleotide of the sequence relative to another position  $j$  of the same sequence.  
95 Therefore, each cell  $(i, j)$  contains either 1, if the nucleotide in position  $i$  is involved in a base pair  
96 with the nucleotide in position  $j$ , or 0 if not. The resulting matrices can be assimilated to dotplots,  
97 with 1 instead of a dot and 0 instead of blank cells. Although very simple, this representation allows  
98 to take into account the relative position of the base pairs in the ssNA sequence, thus retaining a  
99 more complete structural information as compared to the dot-bracket notation.

100 For the clarity of the algorithm description, we will call matrix  $A = (a_{ij})$  the one containing the  
101 information regarding the reference structure and matrix  $B = (b_{ij})$  the one storing the information of  
102 the structure we want to compare to the reference one. We want to define a distance between these  
103 matrices that reflects the proximity between cells containing 1 in both of them, i.e. those indicating  
104 a base pair. For this purpose, each matrix is embedded in the plane in the following way: each  
105  $(i, j)^{\text{th}}$  entry that is equal to 1 is assimilated to the point with coordinates  $(j, L - i + 1)$ . Hence, to a  
106 matrix representing a secondary structure we associate a set of points in the plane with coordinates

107 in  $\{1, \dots, L\}^2$ . Moreover, since both matrices are symmetrical, we consider only the entries below the  
108 diagonal. More precisely, let  $\mathcal{P}_A := \{(j, L - i + 1) \in \mathbb{N}^2 : a_{ij} = 1, 1 \leq j < i \leq L\}$  be the set of points  
109 corresponding with structure  $S_A$ . The set  $\mathcal{P}_B$  is defined analogously. A natural way to measure the  
110 distance between the base pairs in the compared structures is to measure the distance between sets  $\mathcal{P}_A$   
111 and  $\mathcal{P}_B$ . At this scope, any distance between compact sets of points in  $\mathbb{R}^2$  could be appropriate for the  
112 method (e.g. Hausdorff distance [Huttenlocher *et al.*, 1993]). At the moment, AptaMAT algorithm  
113 implements a metric based on the Manhattan distance, which was chosen for its simplicity, as it is  
114 expressed as the sum of the absolute differences between the coordinates of the compared points  
115 [Krause., 1988]. However, other distances can be easily implemented.

116 In AptaMat, for each point  $P$  in  $\mathcal{P}_A$  we find the Manhattan distance to its nearest neighbor in  
117  $\mathcal{P}_B$ , and vice versa. In order to handle all the differences between the structures, it is important to  
118 consider the distance in both directions (Figures S2 and S3, Supplementary Material). Indeed, both  
119 structures do not have necessarily the same number of base pairs. As a consequence, the distances in  
120 the two directions might not be the same and, more importantly, some base pairs might be excluded  
121 from the comparison. Therefore, considering only the distances in one direction might be source of  
122 mistake. Then, the shortest distances between  $\mathcal{P}_A$  and  $\mathcal{P}_B$  sets are summed up. Finally, the obtained  
123 distance is normalized by the total number of base pairs in structures  $S_A$  and  $S_B$ . This is necessary  
124 because some distances might emerge twice in the calculation. Together with solving this issue,  
125 this sort of normalization gives a more important weight to base pairs in common between the two  
126 compared structures. The AptaMat distance, denoted by  $D_{AM}$  is, therefore, defined as

$$D_{AM}(S_A, S_B) := \frac{\sum_{P \in \mathcal{P}_A} d_{\text{Man}}(P, \mathcal{P}_B) + \sum_{P \in \mathcal{P}_B} d_{\text{Man}}(P, \mathcal{P}_A)}{\#\mathcal{P}_A + \#\mathcal{P}_B}, \quad (1)$$

127 where, for any given point  $P = (x, y) \in \mathbb{R}^2$  and any finite subset  $\mathcal{C} \subset \mathbb{R}^2$ , we denote by  $\#\mathcal{C}$  the cardinal  
128 of  $\mathcal{C}$ , and by  $d_{\text{Man}}(P, \mathcal{C})$  the Manhattan distance from  $P$  to its nearest neighbor in  $\mathcal{C}$ .

129 We can easily check that  $D_{AM}$  is symmetric, and it is equal to 0 only when both structures are  
130 identical. In the light of this, the more the AptaMat distance is close to 0 the more the two compared  
131 structures are similar, independently on their length.

## Test set preparation

132 In order to confront AptaMat to the Hamming distance and RNAdistance in comparing ssNA sec-  
133 ondary structures, we built a test set of 10 ssNA with known structures: 5 taken from the work by  
134 Ivry *et al.* [Ivry *et al.*, 2009] and 5 taken from the PDB database (Table S1). The selected ssNA have  
135 different lengths (20 to 127 nucleotides) and different secondary structures, containing stems, hair-  
136 pin/stem loops, bulges, internal loops and junctions. For each sequence, the reference secondary  
137 structure in the dot-bracket notation was either taken from [Ivry *et al.*, 2009] or extrapolated using  
138 x3dna-dssr [Lu *et al.*, 2003] and then used as the reference structure. In addition, for each sequence,  
139 2 or more alternative structures were used to perform the comparison. The alternative structures  
140 for the examples taken from [Ivry *et al.*, 2009] were obtained from the same article, while for those  
141 taken from the PDB database we used 6 different ssNA secondary structure prediction tools, namely  
142 Mfold [Zuker., 2003], LinearFold [Huang *et al.*, 2019], CentroidFold [Hamada *et al.*, 2009], RNAfold  
143 [Gruber *et al.*, 2008a], RNAstructure [Reuter *et al.*, 2010] and MC-Fold [Parisien *et al.*, 2008] to ob-  
144 tain at least two different secondary structures for each ssNA. This was achieved when the predic-  
145 tion tools were not able to correctly predict the secondary structure of the processed sequences. In  
146 addition, we *ad hoc* designed an additional example to clearly show the advantages of AptaMAT over  
147 the two selected metrics of comparison. At this scope, we designed critical secondary structures able  
148 to highlight the limits of the other metrics and the strengths of AptaMat.

## Comparison methods

We compared AptaMat to two of the most used methods of ssNAs secondary structures compar-  
ison: the Hamming distance ([Hamming., 1950]) and RNAdistance from the ViennaRNA package

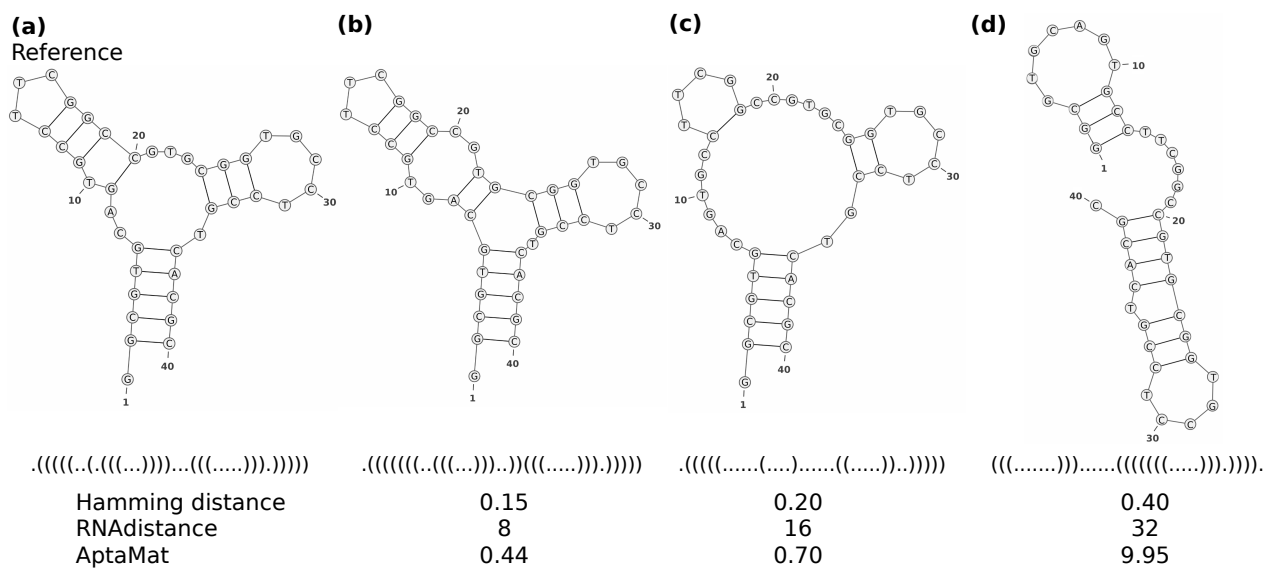

Figure 3: SsNA 7 shows the ability of AptaMat in comparing ssNAs secondary structures. The three metrics (Hamming distance, RNAdistance and AptaMat) indicate that the alternative structures (b), (c) and (d) are progressively farther from the reference secondary structure (a).

[Hofacker *et al.*, 2003]. The former computes the distance between two ssNAs structures of same length  $L$ , by calculating

$$D_{\text{Hamming}}(S_A, S_B) = N_{\text{diff}}/L \quad (2)$$

149 where  $N_{\text{diff}}$  is the number of unmatched positions between the two strings corresponding to the the  
 150 dot-bracket notation of the compared structures. RNAdistance computes the distance between two  
 151 ssNAs structures by representing them as ordered rooted trees. At a full resolution, this representa-  
 152 tion is deducible from the dot-bracket notation by assigning each unpaired nucleotide to a leaf and  
 153 each base pair to an internal node, as showed in Figure 1d. In order to calculate the distance between  
 154 two trees, the tree editing approach is used, which consists in a series of edit operations (deletion,  
 155 insertion or mutation of a node), to which a cost is assigned and that allow to transform a tree  $T_A$  into  
 156 a tree  $T_B$ . The resulting distance  $D_{\text{RNA}}(S_A, S_B)$  corresponds to the minimal total cost of the series of  
 157 operations allowing to transform one tree into the other.

In addition, for the structures taken from [Ivry *et al.*, 2009] (Table S1), we included in the bench-  
 mark of AptaMat the comparison with the algorithm DoPloCompare, which uses an approach based  
 on image processing to measure the distance between two ssNAs secondary structures. This algo-  
 rithm has been selected for comparison with AptaMat, because of its higher sensitivity as compared  
 to the Hamming distance and RNAdistance (Figure 2), and because it is based on the dotplot dia-  
 grams of the compared structures, as AptaMat. The distance grade proposed in this algorithm to  
 compare two structures  $S_A$  and  $S_B$  can be defined as

$$D_{\text{DoPloCompare}}(S_A, S_B) = \text{Dist}(S_A, S_B) / \text{Corr}(S_A, S_B). \quad (3)$$

158 The  $\text{Dist}(S_A, S_B)$  term corresponds to the geometrical distance from the points in the dotplot dia-  
 159 gram of structure  $S_A$  (reference) to the dotplot diagram of structure  $S_B$  (alternative). The  $\text{Corr}$  term  
 160 is related to the cross correlation between histogram vectors built from the dotplot diagrams of both  
 161 structures by adding the number of points in four different directions (X, Y, diagonal and antidiag-  
 162 onal). Although the  $\text{Dist}$  term in DoPloCompare is somehow similar to AptaMat, it doesn't seem to  
 163 be symmetrically defined, and hence it does not take into account the number of base pairs in the  
 164 alternative structure. On the other hand, the  $\text{Corr}$  term accounts for the similarity in the order and  
 165 number of elements that both structures contain, even if the base pairs involved in these elements  
 166 are not the same in structures  $S_A$  and  $S_B$ .

## Results and Discussion

167 We used AptaMat to measure the distance between pairs of secondary structures using the ssNAs re-  
 168 ported in Table S1 and we compared the AptaMat distance with the Hamming distance and RNAdis-

169 tance. Among these, for ssNAs 2, 4, 5, and 7 (Figures 5, 3 and Figures S5 and S6) the Hamming  
170 distances, RNAdistances and AptaMat distances of the alternative secondary structures from the ref-  
171 erence one follow the same trend. This shows the coherence between our method and the most used  
172 distance metrics when there is a clear difference between the compared secondary structures in terms  
173 of both dot-bracket notation and the trees used to calculate RNAdistance. We discuss here the results  
174 for ssNA 7 (Table S1 and Figure 3), since for this ssNA we could gather 3 different alternative struc-  
175 tures, which allows for a more extensive analysis. The three distances from the reference structure  
176 **(a)** progressively increase proceeding from the alternative structure **(b)**, obtained by RNAstructure  
177 [Reuter *et al.*, 2010] (Hamming distance = 0.15, RNAdistance = 8 and AptaMat distance = 0.44), to  
178 **(d)**, obtained by RNAfold ([Gruber *et al.*, 2008a]) (Hamming distance = 0.40, RNAdistance = 32 and  
179 AptaMat distance = 9.95). Indeed, the reference secondary structure **(a)** made of a stem, a multi-  
180 branched loop, a bulge and two hairpin/stem loops is progressively lost. The alternative structure  
181 **(b)** is close to the reference: instead of the original G9-C20 base pair, it has a base pair between C7  
182 and G17 and one between A8 and T18. This leads to the transformation of the bulge in an internal  
183 loop and the reduction of the width of the multi-branched loop. Structure **(c)** has a much wider  
184 multi-branched loop because of the loss of 5 base pairs, which also shorten the two hairpin/stem  
185 loops, with one of them becoming a bulge. Finally, structure **(d)** only conserves 2 hairpin/stem loops  
186 and the bulge but they do not involve the same positions as in the reference.

187 However, sometimes the structural differences between two ssNAs are quite subtle and the Ham-  
188 ming distance and RNAdistance are not able to discriminate between structures. A striking example  
189 is represented by ssNA 1 (Table S1 and Figure 2), which has been taken from [Ivry *et al.*, 2009]. This  
190 example is not based on the analysis of a proper ssNA sequence but it focuses directly on struc-  
191 tures. As shown in Figure 2, the three structures compared to the reference differ from this latter  
192 and one from another. The three alternative structures have an additional bulge, which becomes  
193 progressively wider from structure **(b)** to structure **(d)**, since the third base pair progressively shifts  
194 towards the 5' end. However, both the Hamming distance and RNAdistance predict the same dis-  
195 tance to the reference for the three alternative structures. Indeed, the Hamming distance counts the  
196 number of mismatches between the dot-bracket strings to compare. Therefore, it doesn't take into  
197 account the position of the nucleotides involved in base pairs. As a result, any information about the  
198 structure is lost and different secondary structures with the same number of mismatching positions  
199 as compared to a reference structure will have the same Hamming distance from it. In ssNA 1 all  
200 the alternative structures have 2 mismatching positions, which, accordingly to Equation 2, leads to  
201 a Hamming distance of 0.10 in all the cases. Conversely, RNAdistance takes into account the corre-  
202 lation between opening and closing position of the dot-bracket notation strings. However, it might  
203 happen that the series of editing operations of two comparisons have an equivalent weight leading to  
204 the same RNAdistance, as it occurs in the example of Figure 2 (see Figure S1 for the details). On the  
205 opposite, both AptaMat and DoPloCompare are able to correctly calculate the distance trend, with  
206 the first alternative structure being the closest to the reference (AptaMat distance = 0.67 and DoPlo-  
207 Compare distance = 0.30) and the third alternative structure being the furthest (AptaMat distance =  
208 2.00 and DoPloCompare distance = 1.00).

209 SsNAs 3, 6, 9, and 10 also show the same RNAdistance and/or Hamming distance between differ-  
210 ent predicted structures and their reference (Figures S4, S7, S9 and S10). As mentioned before, the  
211 Hamming distance will be the same if the alternative structures have the same number of mismatch-  
212 ing positions as compared to the reference one. However, depending on the number and the position  
213 of the mismatches, the structural difference might become highly relevant and lead to wrong con-  
214 clusions about the similarity of a structure to a reference one. In order to highlight the issues arising  
215 from the Hamming distance and RNAdistance in a unique example, we *ad hoc* created the example  
216 reported in Figure 4 (ssNA 11 in Table S1). As for ssNA 1, we decided to focus on the secondary  
217 structures and not on the nucleotide sequence. The structures **(b)** and **(c)** have the same Hamming  
218 distance to the reference structure **(a)**, since they both have 4 mismatching positions. However, struc-  
219 ture **(c)** doesn't have the N12-N19 and N13-N18 base pairs, leading to the loss of the hairpin/stem  
220 loop. Conversely, structure **(b)** maintains the reference structure consisting of a hairpin, a bulge, an  
221 internal loop and the hairpin/stem loop, although the bulge is 3 nucleotides shorter and the internal

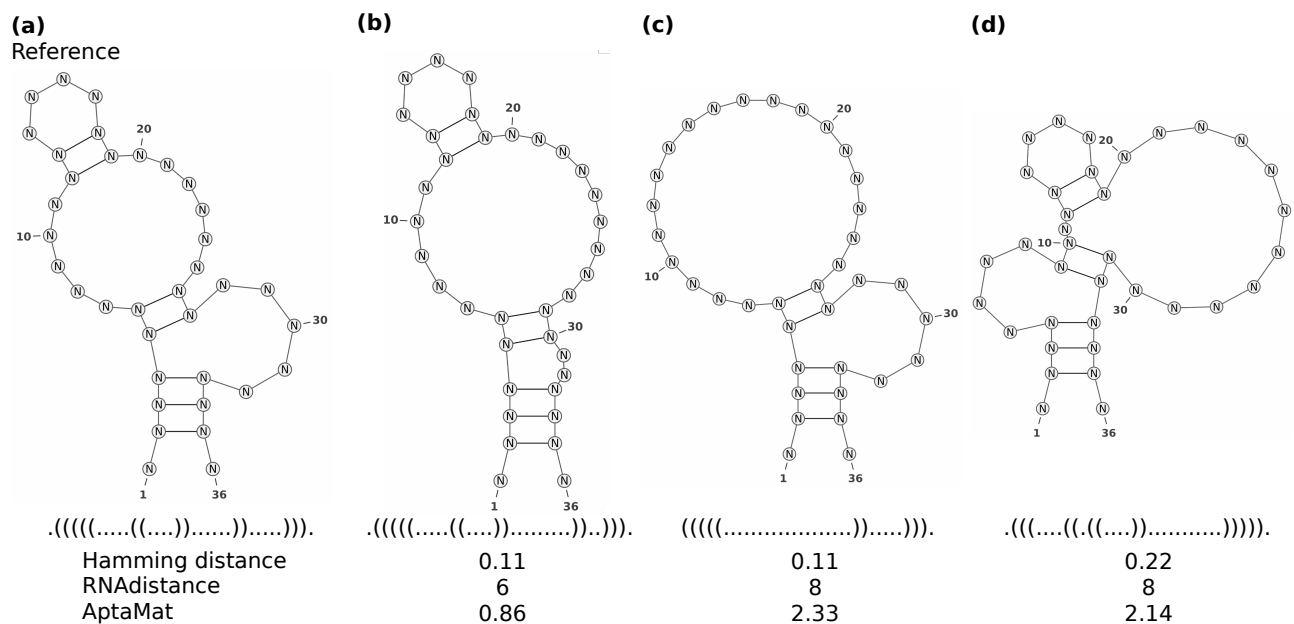

Figure 4: SsNA 11 shows the limits of the Hamming distance and RNAdistance in comparing ssNAs secondary structures. Alternative structures (b) and (c) have the same Hamming distance to the reference secondary structure (a), although structure (c) misses the hairpin/stem loop. Alternative structures (c) and (d) have the same RNAdistance to the reference secondary structure (a), although the bulge and the internal loop involve different nucleotides as compared to the reference.

loop 3 nucleotides wider. This clearly comes out from RNAdistance and AptaMat, both indicating that structure (b) is closer to the reference structure than structure (c).

Within the example in Figure 4 we can further investigate the limits of RNAdistance, since structures (c) and (d) have the same RNAdistance to the reference structure (a). Indeed, the sum of the weights associated to the editing tree operations from (c) to (a) and from (d) to (a) is the same (Figure S10). Conversely, although both the alternative structures (c) and (d) are far from the reference, AptaMat indicates that structure (d) is slightly closer to the reference than structure (c). As previously said, because of the loss of the missing N12-N19 and N13-N18 base pairs, structure (c) doesn't have the hairpin/stem loop present in the reference, although the hairpin and the bulge involve the same nucleotides as in the reference (N2-N35, N3-N34, N4-N33, N5-N27 and N6-N26). Conversely, structure (d) keeps the overall structure of the reference and the same number of base pairs, but the bulge and the internal loop don't involve exactly the same nucleotides as the reference: base pairs N2-N35, N3-N34, N4-N33, N12-N19 and N13-N18 are maintained, while base pairs N5-N27 and N6-N26 are replaced by base pairs N9-N22 and N10-N21. Together with being able to observe even a slight difference in the distance from structures (c) and (d) to the reference structure (a), AptaMat focuses more on the overall secondary structure and the conserved base pairs than on the matching positions of the dot-bracket notations, as required when working on ssNAs, whose function is structure-dependent. Similar observations can be done for ssNAs 9 and 10 (Figures S9 and S10), where the ssNA reference secondary structure has been extrapolated from the 2VJU and 5HRU PDB entries, respectively.

Together with being able to distinguish between differences in pairs of compared structures, AptaMat is capable to establish more meaningful ranking of the alternative secondary structures in terms of distance from the reference as compared to the Hamming distance and RNAdistance in all the examples herein presented. This is important when investigating the effect of sequence mutations on the ssNAs secondary structure. In this context, ssNAs 3, 5, 6, 8 and 9 (Table S1) show the limits of these latter methods as compared to AptaMat. Here we focus our discussion on ssNA 6, which has more alternative structures than ssNAs 3, 5 and 9, and more subtle modifications than ssNA 8. Thus, this example offers the possibility to deeply explore the differences between the considered metrics. SsNA 6 (PDB ID: 1NGO) has a simple hairpin/stem loop structure (Figure S7). The alternative structure (b) obtained by CentroidFold is correctly considered by the three metrics as the closest one to the experimental structure (Hamming distance = 0.074, RNAdistance = 2 and AptaMat = 0.091). AptaMat then indicates that the alternative structure (d) obtained by MC-Fold is closer to the reference (AptaMat distance = 0.20) than the alternative structure (c) obtained by RNAfold (AptaMat distance = 0.22), since the former only misses two pairs of bases (T5-G23 and T6-G22) while

256 maintaining the overall structure. Conversely, structure (c) has 2 additional base pairs that lead to  
257 the loss of the characteristic loop of 1NGO (Figure S7). On the opposite, the Hamming distance fails  
258 in finding this difference, and RNAdistance suggests the opposite trend, with structures (c) and (d)  
259 having an RNAdistance of 6 and 8, respectively. Similar conclusions are applicable to ssNA 3 and  
260 8 (Figures S4 and S8), while for ssNAs 5 and 9 (Figures S6 and S9) the Hamming distance indicates  
261 an opposite and inadequate ranking of the two alternative structures in terms of distance from the  
262 reference, because of the different number of mismatches.

263 The overall better performance of AptaMat as compared to the Hamming distance and RNAdis-  
264 tance in ranking the alternative secondary structures in terms of distance from a reference is partic-  
265 ularly evident for structures having a similar distance from the reference, which are more difficult to  
266 properly rank. The ability of AptaMat in doing so is due to the higher weight given by our algorithm  
267 to the relative position of the base pairs. This leads to focus on the global secondary structure more  
268 than on the local differences from the reference secondary structure. As previously mentioned, this  
269 is of particular importance for the comparison of ssNAs, since their function highly depends on their  
270 global 3D structure and only to a minor extent on local sequence information.

271 In addition, together with the better performance as compared to RNAdistance and the Hamming  
272 distance, AptaMat has the advantage of being easy to interpret. Indeed, by observing the herein re-  
273 ported examples, we could suggest a threshold of about 2 to conclude on the proximity of a sequence  
274 to the reference one: an AptaMat distance below this threshold indicates that the two structures are  
275 close, while a greater distance indicates that the two structures are far one from another. This is sup-  
276 ported also by a benchmark study on the the available ssNAs secondary structures prediction tools  
277 we performed (article in preparation), but this threshold can be adapted for different applications.  
278 On the opposite, RNAdistance relies on tree editing operations with fixed weights, which cannot be  
279 interpreted in an absolute way: although the lower is the RNAdistance the closer are the compared  
280 structures, an RNAdistance of 8 might indicate close structures as in ssNA 7 (Figure 3b) but it can  
281 also be associated to more relevant changes in the ssNA structures as in ssNA 11 (Figure 4c).

282 The analysis of the alternative structures ranking relative to the reference structure allows also to  
283 highlight the limits of DoPloCompare as compared to AptaMat. SsNAs 2, 4 and 5 (Figure 5 Figures  
284 S5 and S6) have a DoPloCompare trend opposite not only to AptaMat but also to the Hamming  
285 distance and RNAdistance. We argue that this is due to the *Corr* term in DoPloCompare, which, as  
286 we mentioned before, accounts for the similarities in the number and order of the elements (stems,  
287 loops, etc.) in the compared structures. In the three previous examples, the structures that are found  
288 to be closer to the reference one are those having a more similar number of elements, despite the fact  
289 that the base pairs involved in these elements are not the same. For example, if we consider ssNA  
290 2 (Figure 5), we can clearly see that the alternative structures (b) and (c) are both structurally far  
291 from the reference structure (a). However, the structure (b) is closer to the reference (a) (Hamming  
292 distance = 0.15, RNAdistance = 24 and AptaMat = 6.35) than the alternative structure (c) (Hamming  
293 distance = 0.41, RNAdistance = 26 and AptaMat = 7.50), as correctly indicated by the Hamming  
294 distance, RNAdistance and AptaMat. Indeed, structure (b) maintains the secondary structure of  
295 the reference except for 3 missing base pairs (G28-C37, G29-C36 and C30-G35), while structure (c)  
296 has 4 additional base pairs (C5-G39, C6-G38, C12-G27, U13-G26), leading to a significant change  
297 in the global structure. DoPloCompare indicates that this latter structure is closer to the reference  
298 (DoPloCompare = 0.12) than structure (b) (DoPloCompare = 0.13), because structure (c) has two  
299 hairpin/stem loops and an internal loop as structure (a), while structure (b) only has a hairpin/stem  
300 loop and an internal loop. However, the global structure (c) differs from those in structure  
301 (a), because of a different base pairs pattern. In addition, the DoPloCompare scores are close to 0,  
302 suggesting a high similarity of the alternative structures to the reference one, which is clearly not the  
303 case as indicated by RNAdistance and AptaMat. Similar observations can be done for ssNAs 4 and  
304 5 (Figures S5 and S6). Furthermore, looking at the DoPloCompare scores obtained for ssNAs 1 to  
305 5, it seems that they depend on the sequence length: although the alternative structures of ssNAs 1  
306 (Figure 2) are globally close to the reference one, they show a DoPloCompare score which is higher  
307 than those obtained for ssNAs 2 to 5, where the alternative structures are very far from the reference,  
308 as also showed by the RNAdistance and AptaMat.



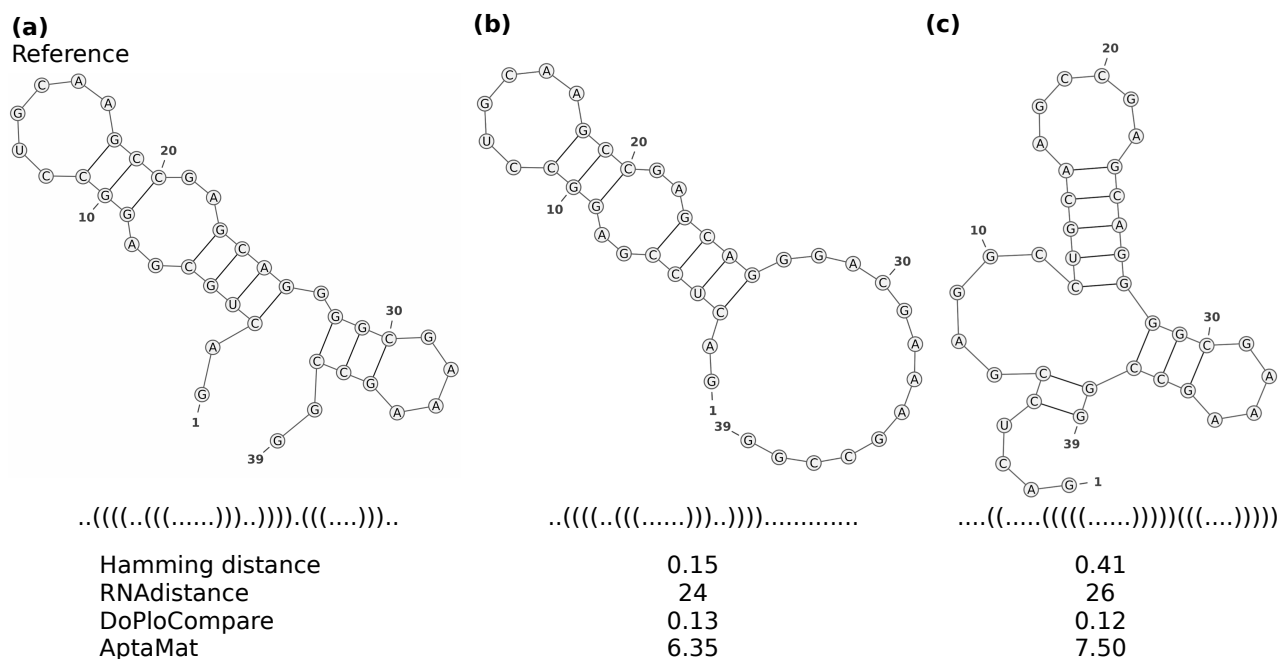

Figure 5: SsNA 2 shows the limits of DoPloCompare in ranking the alternative secondary structures in terms of distance from the reference. The alternative structure (b) is closer to the reference according to the Hamming distance, RNAdistance and AptaMat, since it has the same internal loop and one hairpin/stem loop, while the alternative structure (c) involves different nucleotides in one of the hairpin/stem loops and it assumes a 3-ways junction structure.

## Conclusion

309 Being able to compare ssNAs secondary structures is fundamental to understand the function and  
 310 evolution of this kind of biomolecules, to design ssNAs with a desired secondary structure or even to  
 311 predict the conformational effects of sequence mutations. In the light of this, in this work we present  
 312 AptaMat, a new matrix-based algorithm, capable of comparing pairs of ssNAs secondary structures  
 313 of the same length  $L$ . AptaMat takes as input the two ssNAs structures in the dot-bracket notation  
 314 and, for each of them, creates a matrix of size  $L \times L$ , named  $A = (a_{ij})$  and  $B = (b_{ij})$ . The  $(i, j)^{\text{th}}$  entry of  
 315 the matrix is either equal to 1 if the nucleotide in position  $i$  is paired with the nucleotide in position  $j$   
 316 or 0 if the nucleotides in positions  $i$  and  $j$  are not paired. Then, for each  $1 \leq i < j \leq L$  such that  $a_{ij} = 1$ ,  
 317 the Manhattan distance to the closest entry equal to 1 in matrix  $B$ , and vice versa, is calculated. The  
 318 distances between all the closest pairs are summed up and normalized by the total number of cells  
 319 containing 1 in both matrices, leading to AptaMat distance.

320 We compared AptaMat to two of the most used metrics for ssNAs secondary structures com-  
 321 parison, namely the Hamming distance and RNAdistance, and to a more recent approach based on  
 322 image processing, DoPloCompare, by [Ivry *et al.*, 2009]. In order to do this, we chose 5 structures  
 323 taken from the examples reported in the work by Ivry *et al.* and 5 structures taken from the PDB  
 324 database. In addition, we *ad hoc* created an additional structure in order to clearly show the advan-  
 325 tages of AptaMat over the Hamming distance and RNAdistance.

326 We showed that AptaMat is able to properly distinguish between different structures, presenting  
 327 a higher sensitivity as compared to the Hamming distance and RNAdistance. In addition, our method  
 328 allows to more adequately rank the ssNAs structures as a function of their distance from a reference  
 329 in all the examples herein discussed, which is not the case for the Hamming distance, RNAdistance  
 330 and DoPloCompare. Moreover, it is easy to interpret, with an AptaMat distance of 2 as a reasonable  
 331 threshold between close and far structures, but this threshold can be adapted depending on the  
 332 applications. By definition, AptaMat is less affected by ssNA length than other of the considered  
 333 metrics. Additionally, AptaMat is easy to implement and to manipulate. Indeed, we plan to extend  
 334 its usage to ssNAs of different lengths by previous alignment, and to peculiar structures, such as  
 335 pseudoknots and G-quadruplex, which represent a challenging task in nucleic acids modeling.

## Funding

This work has been supported by *Centre National de la Recherche Scientifique*, by *Ministère de l'Enseignement Supérieur et de la Recherche*, and by the European Union and FEDER (*Fonds Européens de Développe-*

ment Régional).

## Data Availability

The python code for AptaMat is available at <https://github.com/GEC-git/AptaMat.git>

## References

- [Berman *et al.*, 2000] Berman, Helen M. and Westbrook, John and Feng, Zukang and Gilliland, Gary and Bhat, T. N. and Weissig, Helge and Shindyalov, Ilya N. and Bourne, Philip E. (2000). The Protein Data Bank. *Nucleic Acids Res*, **28**(3), 235-242.
- [Bonhoeffer *et al.*, 1993] Bonhoeffer, S. and McCaskill, J. S. and Stadler, P. F. and Schuster, P. (1993). RNA multi-structure landscapes - A study based on temperature dependent partition functions. *European Biophysics Journal*, **22**(1), 13-24.
- [Darty *et al.*, 2009] Darty, K., Denise, A., and Ponty, Y. (2009). VARNA: Interactive drawing and editing of the RNA secondary structure. *Bioinformatics*, **25**(15), 1974–1975.
- [Flamm *et al.*, 2001] Flamm, C., Hofacker, I. L., Maurer-Stroh, S., Stadler, P. F., and Zehl, M. (2001). Design of multistable RNA molecules. *RNA*, **7**(2), 254–265.
- [Fontana *et al.*, 1993] Fontana, W., Konings, D. A., Stadler, P. F., and Schuster, P. (1993). Statistics of RNA secondary structures. *Biopolymers*, **33**(9), 1389–1404.
- [Giegerich *et al.*, 2004] Giegerich, R., Voß, B., and Rehmsmeier, M. (2004). Abstract shapes of RNA. *Nucleic Acids Research*, **32**(16), 4843–4851.
- [Gruber *et al.*, 2008a] Gruber, A. R., Bernhart, S. H., Hofacker, I. L., and Washietl, S. (2008). Strategies for measuring evolutionary conservation of RNA secondary structures. *BMC bioinformatics*, **9**(1), 122.
- [Gruber *et al.*, 2008b] Gruber, A. R., Lorenz, R., Bernhart, S. H., Neuböck, R., and Hofacker, I. L. (2008). The Vienna RNA websuite. *Nucleic acids research*, **36**(Suppl2), W70–W74.
- [Hamada *et al.*, 2009] Hamada, M., Kiryu, H., Sato, K., Mituyama, T., and Asai, K. (2009). Prediction of RNA secondary structure using generalized centroid estimators. *Bioinformatics*, **25**(4), 465–473.
- [Hamming., 1950] Hamming, R. W. (1950). Error Detecting and Error Correcting Codes. *Bell System Technical Journal*, **29**(2), 147–160.
- [Hofacker *et al.*, 2003] Hofacker, I. L. (2003). Vienna RNA secondary structure server. *Nucleic Acids Research*, **31**(13), 3429–3431.
- [Hofacker *et al.*, 1994] Hofacker, I. L., Fontana, W., Stadler, P. F., Bonhoeffer, L. S., Tacker, M., and Schuster, P. (1994). Fast folding and comparison of RNA secondary structures. *Monatshefte für Chemie Chemical Monthly*, **125**(2), 167–188.
- [Huang *et al.*, 2019] Huang, L., Zhang, H., Deng, D., Zhao, K., Liu, K., Hendrix, D. A., and Mathews, D. H. (2019). LinearFold: Linear-time approximate RNA folding by 5'-to-3' dynamic programming and beam search. *Bioinformatics*, **35**(14), i295–i304.
- [Huttenlocher *et al.*, 1993] Huttenlocher, D. P., Klanderman, G. A., and Rucklidge, W. J. (1993). Comparing Images Using the Hausdorff Distance. *IEEE Transactions on Pattern Analysis and Machine Intelligence*, **15**(9), 850–863.
- [Ivry *et al.*, 2009] Ivry, T., and Michal, S., Avihoo, A., Sapiro, G., Barash, D. (2009). An image processing approach to computing distances between RNA secondary structures dot plots. *Algorithms for Molecular Biology*, **4**, 4.

- [Krause., 1988] Krause, E. (1988). *Taxicab Geometry: An Adventure in Non-Euclidean Geometry*, 72. Dover Publications.
- [Kulabhusan *et al.*, 2020] Kulabhusan, Prabir Kumar and Hussain, Babar and Yüce, Meral (2020). Current perspectives on aptamers as diagnostic tools and therapeutic agents. *Pharmaceutics*, **12**(7), 1-23.
- [Li *et al.*, 2020] Li, Long and Xu, Shujuan and Yan, He and Li, Xiaowei and Yazd, Hoda Safari and Li, Xiang and Huang, Tong and Cui, Cheng and Jiang, Jianhui and Tan, Weihong (2020). Nucleic Acid Aptamers for Molecular Diagnostics and Therapeutics: Advances and Perspectives. *Angewandte Chemie International Edition*, **59**(5), 2-13.
- [Lu *et al.*, 2003] Lu, X. and Olson, W. K. (2003). 3DNA: a software package for the analysis, rebuilding and visualization of three-dimensional nucleic acid structures. *Nucleic Acids Research*, **31**(17), 5108–5121.
- [Moulton *et al.*, 2000] Moulton, V., Zuker, M., Steel, M., Pointon, R., and Penny, D. (2000). Metrics on RNA Secondary Structures. *Journal of Computational Biology*, **7**(1-2), 277–292.
- [Mustoe *et al.*, 2014] Mustoe, A. M., Brooks, C. L., and Al-Hashimi, H. M. (2014). Hierarchy of RNA Functional Dynamics. *Annual Review of Biochemistry*, **83**(1), 441–466.
- [Nimjee *et al.*, 2017] Nimjee, Shahid M. and White, Rebekah R. and Becker, Richard C. and Sullenger, Bruce A. (2017). Aptamers as Therapeutics. *Annual Review of Pharmacology and Toxicology*, **57**(1), 61-79.
- [Parisien *et al.*, 2008] Parisien, M. and Major, F. (2008). The MC-Fold and MC-Sym pipeline infers RNA structure from sequence data. *Nature*, **452**(7183), 51–55.
- [Reuter *et al.*, 2010] Reuter, J. S. and Mathews, D. H. (2010). RNAstructure: Software for RNA secondary structure prediction and analysis. *BMC Bioinformatics*, **11**(1), 1-9.
- [Sato *et al.*, 2009] Sato, K., Hamada, M., Asai, K., and Mituyama, T. (2009). CentroidFold: A web server for RNA secondary structure prediction. *Nucleic Acids Research*, **37**(SUPPL. 2), W277-W280.
- [Shapiro *et al.*, 1988] Shapiro, B. A. (1988). An algorithm for comparing multiple RNA secondary structures. *Bioinformatics*, **4**(3), 387–393.
- [Washietl *et al.*, 2005] Washietl, S., Hofacker, I. L., and Stadler, P. F. (2005). Fast and reliable prediction of noncoding RNAs. *Proceedings of the National Academy of Sciences of the United States of America*, **102**(7), 2454–2459.
- [Zuker., 2003] Zuker, M. (2003). Mfold web server for nucleic acid folding and hybridization prediction. *Nucleic Acids Research*, **31**(13), 3406–3415.
